# Supplementary material for: To escape or to pursue: opposite decision making concerning a single moving object is influenced by starvation and sex
Source: Oxford University Press journal article supplement (doi:10.1242/jeb.245297), 2023-03-27
Supplement: jeb245297supp.pdf [file jeb245297supp.pdf]

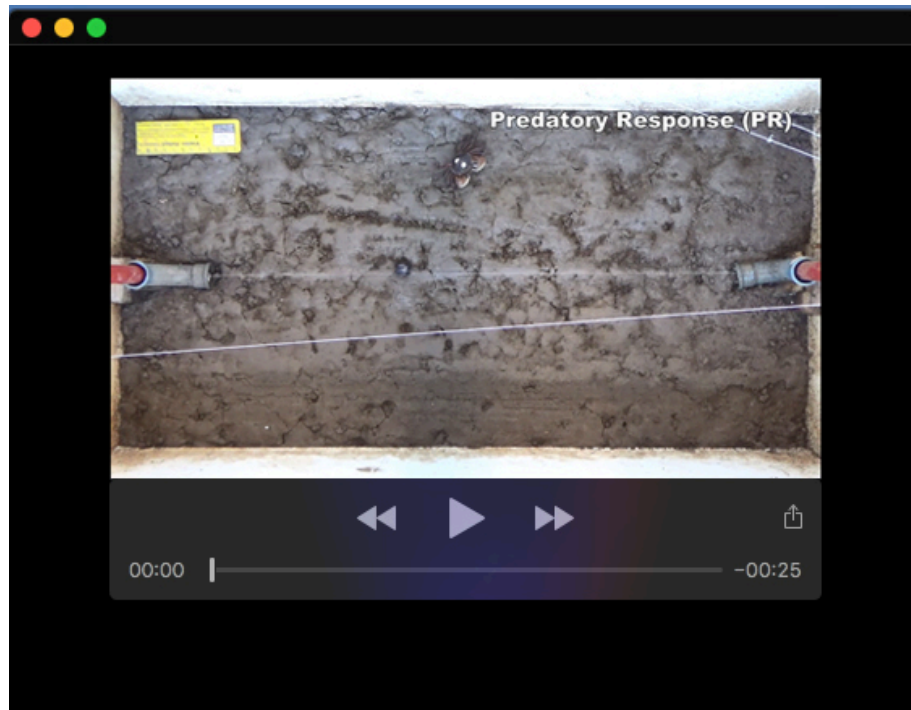

**Movie 1. Three examples of crab responses to a moving dummy.**

This video illustrates a predatory response (PR), an avoidance response (AR) and a freezing response (FR), elicited within the experimental arena by a medium dummy moved on the ground. For further experimental details, see the main text.
